# Supplementary material for: The Increasing Trend in Caesarean Section Rates: Global, Regional and National Estimates: 1990-2014
Source: PLoS One. 2016 Feb 5;11(2):e0148343. doi: 10.1371/journal.pone.0148343 (PMC4743929; doi:10.1371/journal.pone.0148343)
Supplement: S2 File — Data set compiled for the analysis of caesarean section rates and trends. (PDF) [file pone.0148343.s002.pdf]

Page 3
